# Supplementary material for: Controllable synthesis of layered double hydroxide nanosheets to build organic inhibitor-loaded nanocontainers for enhanced corrosion protection of carbon steel
Source: Royal Society of Chemistry journal article supplement (doi:10.1039/d3na00570d), 2024-01-01
Supplement: d3na00570d1.pdf [file d3na00570d1.pdf]

## SUPPORTING INFORMATION

### **Controllable synthesis of layered double hydroxide nanosheets to build organic inhibitor-loaded nanocontainers for enhanced corrosion protection of carbon steel**

Minh Vuong Phan <sup>a,c,\*</sup>, Thi Kim Thoa Tran <sup>a,c</sup>, Quynh Nhu Pham <sup>a</sup>, Manh Huy Do <sup>a</sup>, Thi Hong No Nguyen <sup>a,c</sup>, Minh Ty Nguyen <sup>a</sup>, Thanh Thao Phan <sup>a,c</sup>, Thi Xuan Hang To <sup>b,c</sup>.

*<sup>a</sup>Institute of Chemical Technology, Vietnam Academy of Science and Technology, Ho Chi Minh City 700000, Vietnam.*

*<sup>b</sup>Institute for Tropical Technology, Vietnam Academy of Science and Technology, Hanoi 100000, Vietnam.*

*<sup>c</sup>Graduate University of Science and Technology, Vietnam Academy of Science and Technology, Hanoi 100000, Vietnam.*

\*Email: pmvuong@ict.vast.vn. Tel : +84909312860

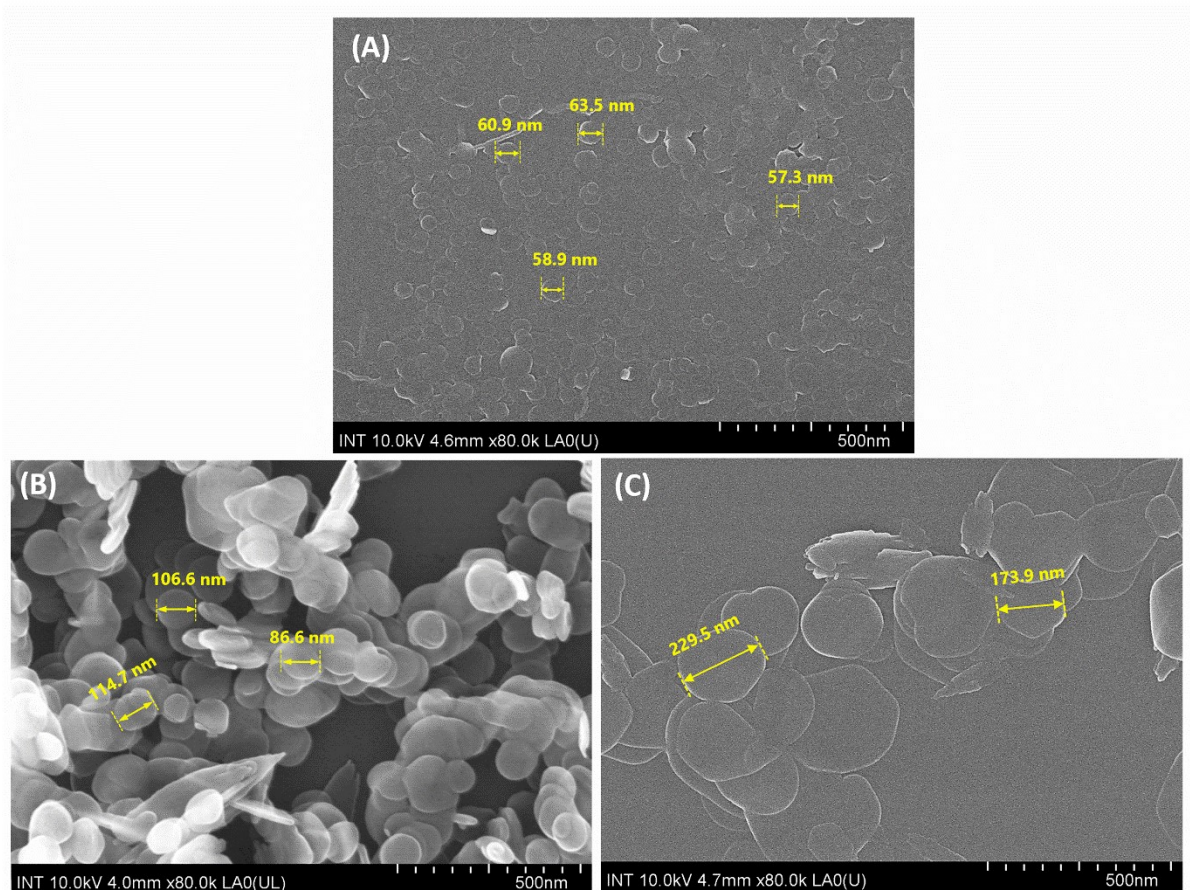

**Figure S1.** FE-SEM image of LDH-Cl samples hydrothermally treated at 80 °C (A), 100 °C (B) and 150 °C (C)

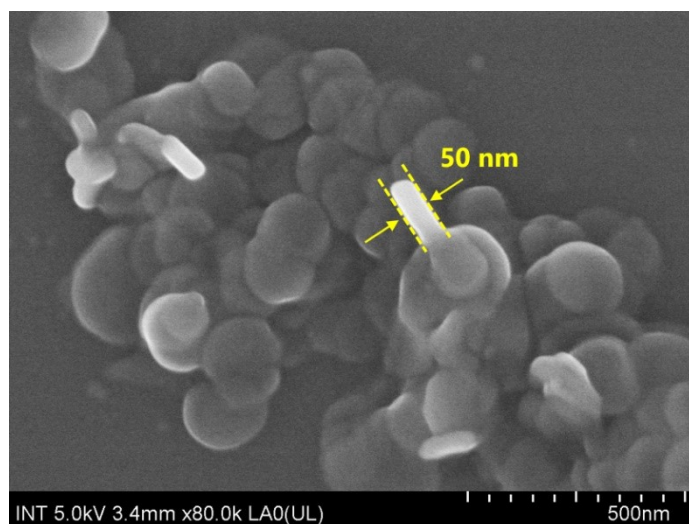

**Figure S2.** FE-SEM image of prepared LDH-Cl-F hydrothermal treatment at 125 °C

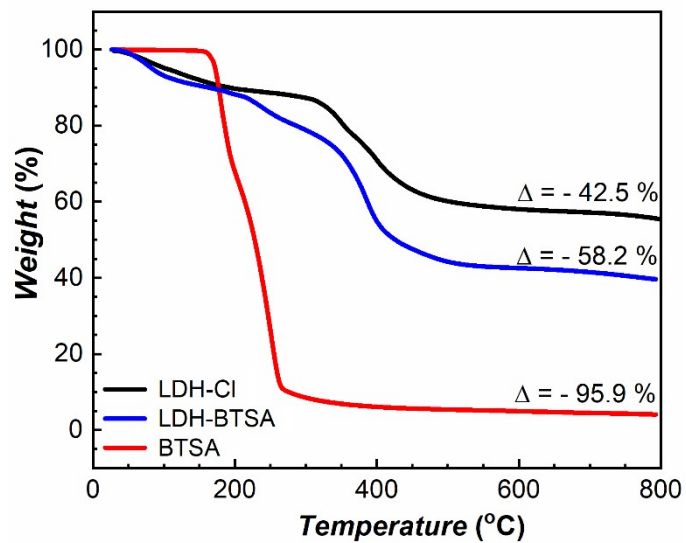

**Figure S3.** TGA variation curves of BTSA, LDH-Cl and LDH-BTSA

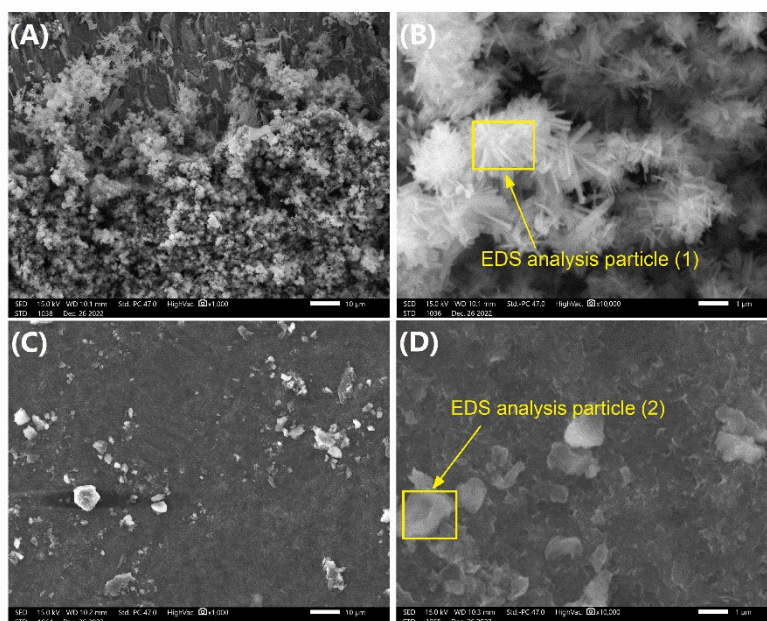

**Figure S4.** SEM image of steel electrode surface after 24 hours immersion in 0.1 M NaCl solution without inhibitor (A, B) and with 3 g/L of LDH-BTSA (C, D).

**Table S1.** The zeta potential and hydrodynamic size of the prepared LDH-Cl under various hydrothermal treatment temperatures.

| Samples    | Hydrothermal temperature (°C) | Zeta potential (mV) | Z-average (nm) | PI value |
|------------|-------------------------------|---------------------|----------------|----------|
| LDH-Cl-80  | 80                            | +61.7               | 77.4           | 0.171    |
| LDH-Cl-100 | 100                           | +72.1               | 115.4          | 0.195    |
| LDH-Cl-125 | 125                           | +73.9               | 168.4          | 0.180    |
| LDH-Cl-150 | 150                           | +75.6               | 212.5          | 0.131    |

**Table S2.** Basal spacing and lattice parameters of LDH crystallites.

| Samples | LDH-CI         |                    |        |                         |        | LDH-BTSA       |                    |        |                         |        |
|---------|----------------|--------------------|--------|-------------------------|--------|----------------|--------------------|--------|-------------------------|--------|
|         | 2 $\theta$ (°) | $\theta$ (radians) | d (nm) | Lattice parameters (nm) |        | 2 $\theta$ (°) | $\theta$ (radians) | d (nm) | Lattice parameters (nm) |        |
|         |                |                    |        | a                       | c      |                |                    |        | a                       | c      |
| (003)   | 11.279         | 0.098              | 0.7839 |                         |        | 5.372          | 0.047              | 1.6438 |                         |        |
| (006)   | 22.643         | 0.198              | 0.3924 | 0.3058                  | 2.3531 | 11.238         | 0.098              | 0.7867 | 0.3038                  | 4.8258 |
| (110)   | 60.509         | 0.528              | 0.1529 |                         |        | 60.951         | 0.532              | 0.1519 |                         |        |

The  $2\theta$  positions of the peak in the XRD pattern are used to calculate the basal spacing ( $d_{003}$ ) and lattice parameters of LDH. The interlayer spacing was determined using Bragg's law:  $d = \lambda / 2\sin\theta$ . Here,  $\lambda$  is the X-ray wavelength ( $\lambda = 1.5418$  nm), and  $\theta$  is the (003) diffraction angle. Lattice parameters  $a$  and  $c$  represent the metal-metal cation distances in the lamellar layer and unit cell thickness of LDH, respectively, were calculated using the  $2\theta$  angle position of (003), (006) and (110) diffraction peaks:  $a = 2d_{(110)}$  and  $c = 3/2[d_{(003)} + 2d_{(006)}]$  [1,2].

[1] Vieira, D.; Sokol, D.; Smalenskaite, A.; Kareiva, A.; Ferreira, M.; Vieira, J.; Salak, A. Cast iron corrosion protection with chemically modified MgAl layered double hydroxides synthesized using a novel approach. *Surf. Coat. Technol.* **2019**, *375*, 158-163.

[2] Zhao, Y.; Li, F.; Zhang, R.; Evans, D. G.; Duan, X. Preparation of layered double-hydroxide nanomaterials with a uniform crystallite size using a new method involving separate nucleation and aging steps. *Chem. Mater.* **2002**, *14* (10), 4286-4291.

**Table S3.** The Tafel parameters from the polarization curves of steel electrodes in 0.1 M NaCl solution with and without inhibitors after 2 h of immersion.

| Samples  | $E_{\text{corr}}$ (mV) | $i_{\text{corr}}$ ( $\mu\text{A}\cdot\text{cm}^{-2}$ ) | $\beta_a$ (mVdec $^{-1}$ ) | $-\beta_c$ (mVdec $^{-1}$ ) | $\eta_i$ (%) |
|----------|------------------------|--------------------------------------------------------|----------------------------|-----------------------------|--------------|
| Blank    | -613.589               | 19.202                                                 | 102.4                      | 885.4                       | -            |
| BTSA     | -335.079               | 0.598                                                  | 178.4                      | 112.0                       | 96.9         |
| LDH-Cl   | -555.169               | 12.987                                                 | 114.4                      | 820.3                       | 32.4         |
| LDH-BTSA | -439.462               | 1.866                                                  | 202.2                      | 143.1                       | 90.3         |

Where  $E_{\text{corr}}$ ,  $i_{\text{corr}}$ ,  $\beta_a$ ,  $\beta_c$ ,  $\eta_i$  are corrosion potential, corrosion current density, Tafel slope of anodic, cathodic, and inhibition efficiency, respectively. The inhibitor efficiency was determined by the equation:  $\eta_i = 100\% \times (i^{\circ} - i^{\text{n}}) / i^{\circ}$ ; where  $i^{\text{n}}$  and  $i^{\circ}$  is the corrosion density of the electrode exposed in NaCl with and without the inhibitor.

**Table S4.** Fitting parameters from the EIS diagram of mild steel electrode immersed in NaCl 0.1 M solution with and without inhibitors at different immersion time

| Samples  | Time (h) | $R_s$ ( $\Omega.cm^2$ ) | $R_p$ ( $\Omega.cm^2$ ) | $Q_{dl}$ ( $mFs^{(n-1)}. cm^{-2}$ ) | $n_{dl}$ | $R_f$ ( $\Omega.cm^2$ ) | $Q_f$ ( $mFs^{(n-1)}. cm^{-2}$ ) | $n_f$ |
|----------|----------|-------------------------|-------------------------|-------------------------------------|----------|-------------------------|----------------------------------|-------|
| Blank    | 2        | 27.3                    | 1300                    | 1.287                               | 0.68     | -                       | -                                | -     |
|          | 4        | 33.3                    | 1224                    | 2.066                               | 0.65     | -                       | -                                | -     |
|          | 8        | 33.8                    | 1078                    | 2.119                               | 0.65     | -                       | -                                | -     |
|          | 24       | 34.5                    | 1059                    | 2.506                               | 0.62     | -                       | -                                | -     |
| LDH-Cl   | 2        | 26.8                    | 1571                    | 0.559                               | 0.73     | -                       | -                                | -     |
|          | 4        | 32.6                    | 1776                    | 1.125                               | 0.77     | -                       | -                                | -     |
|          | 8        | 30.4                    | 1501                    | 1.382                               | 0.70     | -                       | -                                | -     |
|          | 24       | 30.7                    | 1440                    | 2.042                               | 0.75     | -                       | -                                | -     |
| BTSA     | 2        | 29.2                    | 14190                   | 0.132                               | 0.42     | 3457                    | 0.184                            | 0.77  |
|          | 4        | 29.1                    | 9979                    | 0.281                               | 0.54     | 2660                    | 0.286                            | 0.72  |
|          | 8        | 28.9                    | 4935                    | 0.521                               | 0.58     | 266.2                   | 0.836                            | 0.62  |
|          | 24       | 28.2                    | 2409                    | 1.216                               | 0.66     | 94.3                    | 1.195                            | 0.59  |
| LDH-BTSA | 2        | 29.1                    | 6905                    | 0.136                               | 0.78     | 2746                    | 2.778                            | 0.88  |
|          | 4        | 29.4                    | 9703                    | 0.111                               | 0.79     | 1406                    | 1.601                            | 0.73  |
|          | 8        | 29.8                    | 11271                   | 0.093                               | 0.80     | 1261                    | 0.776                            | 0.81  |
|          | 24       | 30.6                    | 3270                    | 0.221                               | 0.86     | 135.8                   | 0.331                            | 0.73  |

Where  $R_s$ ,  $R_p$ , and  $R_f$  represented solution resistance, polarization resistance, and film resistance, respectively.  $CPE_{dl}$  and  $CPE_f$  are constant phase elements of the double layer and film,  $Q$ , and  $n$  values are parameters of CPE.
